# Supplementary material for: Macrofauna Associated With a Rhodolith Bed at an Oceanic Island in the Eastern Tropical Pacific (Isla del Coco National Park, Costa Rica)
Source: Frontiers journal article supplement (doi:10.3389/fmars.2022.858416), 2022-04-25
Supplement: Data_Sheet_1.docx [file Data_Sheet_1.docx]

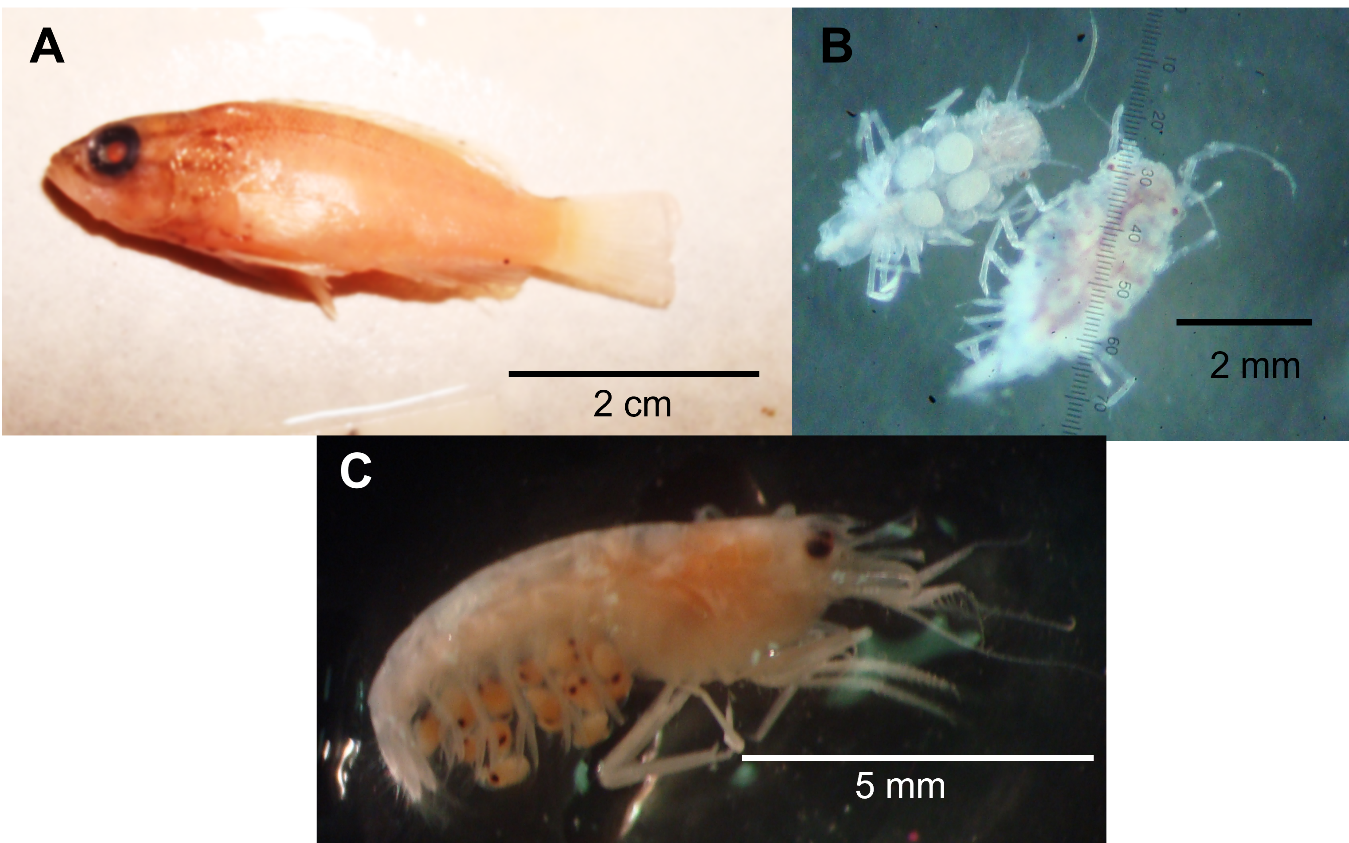


Figure S1. A. Juvenile *Lutjanus colorado*. B. Isopods *Munna* sp. carrying eggs. C. Amphipoda indet. 1. Carrying advanced eggs with embryos.
