# Supplementary material for: Macrofauna Associated With a Rhodolith Bed at an Oceanic Island in the Eastern Tropical Pacific (Isla del Coco National Park, Costa Rica)
Source: Frontiers journal article supplement (doi:10.3389/fmars.2022.858416), 2022-04-25
Supplement: Table_1.DOCX [file Table_1.DOCX]

| Code | Phyllum/ Subphyllum | Class | Order | Superfamily or Family | Genus | Taxon or species | Comments |
| --- | --- | --- | --- | --- | --- | --- | --- |
| 1 | Retaria | Foraminífera | indet. | indet. | indet. | Foraminífera indet. A |  |
| 2 | Retaria | Foraminífera | indet. | indet. | indet. | Foraminífera indet. B |  |
| 3 | Retaria | Foraminífera | indet. | indet. | indet. | Foraminífera indet. C |  |
| 4 | Retaria | Foraminífera | indet. | indet. | indet. | Foraminífera indet. D |  |
| 5 | Retaria | Foraminífera | indet. | indet. | indet. | Foraminífera indet. E |  |
| 6 | Porifera | Demospongiae | indet. | indet. | indet. | Demospongiae indet. A |  |
| 7 | Porifera | Demospongiae | indet. | indet. | indet. | Demospongiae indet. B |  |
| 8 | Cnidaria | Hydrozoa | Hydroida | indet. | indet. | Hydroida indet. A |  |
| 9 | Cnidaria | Hydrozoa | Hydroida | indet. | indet. | Hydroida indet. B |  |
| 10 | Cnidaria | Hydrozoa | Hydroida | indet. | indet. | Hydroida indet. C |  |
| 11 | Cnidaria | Hydrozoa | Hydroida | indet. | indet. | Hydroida indet. D |  |
| 12 | Cnidaria | Hydrozoa | Hydroida | indet. | indet. | Hydroida indet. E |  |
| 13 | Cnidaria | Anthozoa | Actiniaria | indet. | indet. | Actiniaria indet. A |  |
| 14 | Cnidaria | Anthozoa | Actiniaria | indet. | indet. | Actiniaria indet. B |  |
| 15 | Cnidaria | Anthozoa | Actiniaria | indet. | indet. | Actiniaria indet. C |  |
| 16 | Cnidaria | Anthozoa | Actiniaria | indet. | indet. | Actiniaria indet. D |  |
| 17 | Platyhelminthes | Rhabditophora | Polycladida | indet. | indet. | Polycladida indet. |  |
| 18 | Nematoda | indet. | indet. | indet. | indet. | Nematoda indet. |  |
| 19 | Nemertea | indet. | indet. | indet. | indet. | Nemertea indet. A |  |
| 20 | Nemertea | indet. | indet. | indet. | indet. | Nemertea indet. B |  |
| 21 | Annelida | Polychaeta | Scolecida | Capitellidae | *Notomastus* | *Notomastus lineatus* Claparède 1869 |  |
| 22 | Annelida | Polychaeta | Amphinomida | Amphinomidae | *Notopygos* | *Notopygos ornata* Grube 1856 |  |
| 23 | Annelida | Polychaeta | Eunicida | Dorvilleidae | *Dorvillea* | *Dorvillea cerasina* Ehlers 1901 |  |
| 24 | Annelida | Polychaeta | Eunicida | Eunicidae | *Lysidice* | *Lysidice unicornis* Grube 1840 |  |
| 25 | Annelida | Polychaeta | Phyllodocida | Hesionidae | *Hesione* | *Hesione* cf. *intertexta* Grube 1878 |  |
| 26 | Annelida | Polychaeta | Phyllodocida | Hesionidae | *Hesione* | *Hesione panamena* Grube 1878 | New report of species for IC |
| 27 | Annelida | Polychaeta | Phyllodocida | Hesionidae | *Psamathe* | *Psamathe ancuda* Wesemberg-Lund 1962 |  |
| 28 | Annelida | Polychaeta | Phyllodocida | Nereididae | *Ceratonereis* | *Ceratonereis singularis* Treadwell 1929 |  |
| 29 | Annelida | Polychaeta | Phyllodocida | Syllidae | *Exogone* | *Exogone breviantennata* Hartmann-Shcröder 1959 |  |
| 30 | Annelida | Polychaeta | Phyllodocida | Syllidae | *Amblyosyllis* | *Amblyosyllis granosa* Ehlers 1897 | New report of the genus and species for the IC |
| 31 | Annelida | Polychaeta | Phyllodocida | Syllidae | *Syllis* | *Syllis valida* Czerniavsky 1881 |  |
| 32 | Annelida | Polychaeta | Phyllodocida | Syllidae | *Syllis* | *Syllis* sp. |  |
| 33 | Annelida | Polychaeta | Phyllodocida | Syllidae | *Syllis* | *Syllis variegata* Grube 1860 |  |
| 34 | Annelida | Polychaeta | Phyllodocida | Syllidae | *Syllis* | *Syllis hyalina* Grube 1863 |  |
| 35 | Annelida | Polychaeta | Phyllodocida | Syllidae | *Trypanosyllis* | *Trypanosyllis taeniaformis* Haswell 1886 |  |
| 36 | Annelida | Polychaeta | Phyllodocida | Syllidae | *Odontosyllis* | *Odontosyllis fulgurans dolorens* Westheide 1974 |  |
| 37 | Annelida | Polychaeta | Phyllodocida | Syllidae | *Westheidesyllis* | *Westheidesyllis heterocirrata* (Hartmann-Schröder 1959 |  |
| 38 | Annelida | Polychaeta | Phyllodocida | Syllidae | *Pionosyllis* | *Pionosyllis* sp. | New report of genus for IC |
| 39 | Annelida | Polychaeta | Phyllodocida | Syllidae | *Paraehlersia* | *Paraehlersia articulata* Kudenov & Harris 1995 |  |
| 40 | Annelida | Polychaeta | Phyllodocida | Phyllodocidae | *Eteone* | *Eteone pacifica* Hartmann 1936 | New report of the genus and species for IC |
| 41 | Annelida | Polychaeta | Phyllodocida | Phyllodocidae | *Eteone* | *Eteone heteropoda* Hartmann 1951 |  |
| 42 | Annelida | Polychaeta | Phyllodocida | Phyllodocidae | *Sige* | *Sige bifoliata* 1909 |  |
| 43 | Annelida | Polychaeta | Phyllodocida | Phyllodocidae | *Phyllodoce* | *Phyllodoce madeirensis* Langerhans 1880 |  |
| 44 | Annelida | Polychaeta | Phyllodocida | Phyllodocidae | *Phyllodoce* | *Phyllodoce medipapillata* Moore 1909 |  |
| 45 | Annelida | Polychaeta | Phyllodocida | Phyllodocidae | *Nereiphylla* | *Nereiphylla castanea* Marenzeller 1879 |  |
| 46 | Annelida | Polychaeta | Spionida | Chaetopteridae | *Mesochaetopterus* | *Mesochaetopterus minutus* Potts 1914 | New report of the genus and species for IC |
| 47 | Annelida | Polychaeta | Spionida | Cirratulidae | indet. | Cirratulidae indet. |  |
| 48 | Annelida | Polychaeta | Spionida | Megelonidae | *Magelona* | *Magelona californica* 1944 |  |
| 49 | Annelida | Polychaeta | Spionida | Polynoidae | *Harmothoe* | *Harmothoe* sp. |  |
| 50 | Annelida | Polychaeta | Spionida | Polynoidae | *Iphione* | *Iphione ovata* Kinberg 1856 |  |
| 51 | Annelida | Polychaeta | Sabellida | Serpulidae | *Vermiliopsis* | *Vermiliopsis annulata* Schmarda 1861 |  |
| 52 | Annelida | Polychaeta | Spionida | Spionidae | *Prionospio* | *Prionospio dubia* Day 1961 | New report of species for IC |
| 53 | Annelida | Polychaeta | Spionida | Spionidae | *Prionospio* | *Prionospio* sp. |  |
| 54 | Annelida | Polychaeta | Spionida | Spionidae | *Dypolidora* | *Dipolydora socialis* Schmarda 1861 | New rerpot of the genus and species for IC |
| 55 | Annelida | Polychaeta | Sabellida | Sabellidae | *Megaloma* | *Megalomma pacificum* Johansson 1927 |  |
| 56 | Annelida | Polychaeta | Sabellida | Sabellidae | *Branchioma* | *Branchioma costarricense* Tovar-Hernandez & Dean 2010 |  |
| 57 | Annelida | Polychaeta | Sabellida | Serpulidae | *Vermiliopsis* | *Vermiliopsis multiannulata* Moore 1923 | New report of species for I.C |
| 58 | Annelida | Polychaeta | Sabellida | Owenidae | *Owenia* | *Owenia collaris* Hartman 1955 | New report of the genus and species for IC |
| 59 | Mollusca | Polyplacophora | Chitonida | Acanthochitonidae | *Acanthochitona* | *Acanthochitona shaskyi* Ferreira 1987 | New report of species for IC |
| 60 | Mollusca | Polyplacophora | Chitonida | indet. | indet. | Chitonida indet. |  |
| 61 | Mollusca | Pelecypoda | Mytiloida | Mytilidae | *Lithophaga* | *Lithophaga* sp. |  |
| 62 | Mollusca | Pelecypoda | Pterioida | Pteriidae | *Isognomon* | *Isognomon janus* Carpenter 1857 |  |
| 63 | Mollusca | Pelecypoda | Pterioida | Pteriidae | *Isognomon* | *Isognomon recognitus* Mabille 1895 |  |
| 64 | Mollusca | Gastropoda | Vetigastropoda | Turbinidae | *Turbo* | *Turbo saxosus* W.Wood 1828 |  |
| 65 | Mollusca | Gastropoda | Vetigastropoda | Turbinidae | *Eulithidium* | *Eulithidium diantha* J.H. McLean 1970 |  |
| 66 | Mollusca | Gastropoda | Caenogastropoda | Mitridae | *Neotiara* | *Neotiara crenata* Broderip 1836 |  |
| 67 | Mollusca | Gastropoda | Caenogastropoda | Mitridae | *Neotiara* | *Neotiara muricata* Broderip 1836 | New report of species for IC |
| 68 | Mollusca | Gastropoda | Caenogastropoda | Muricidae | *Pascula* | *Pascula rufonotata* Carpenter 1864 |  |
| 69 | Mollusca | Gastropoda | Caenogastropoda | Muricidae | *Morula* | *Morula* uva Röding 1798 |  |
| 70 | Mollusca | Gastropoda | Caenogastropoda | Terebridae | *Neoterebra* | *Neoterebra elata* Hinds 1844 |  |
| 71 | Mollusca | Gastropoda | Caenogastropoda | Turridae | *Kermia* | *Kermia* sp. | New report of genus for IC |
| 72 | Mollusca | Gastropoda | Caenogastropoda | Columbellidae | *Costoanachis* | *Costoanachis* sp. | New report of genus for IC |
| 73 | Mollusca | Gastropoda | Caenogastropoda | Triphoriidae | *Triphora* | *Triphora* sp. |  |
| 74 | Mollusca | Gastropoda | Caenogastropoda | Cerithiopsidae | *Cerithiopsina* | *Cerithiopsina adamsi* Bartsch 1911 |  |
| 75 | Mollusca | Gastropoda | Caenogastropoda | Cerithiopsidae | *Cerithiopsina* | *Cerithiopsina* sp. |  |
| 76 | Mollusca | Gastropoda | Caenogastropoda | Coralliophilidae | *Babelomurex* | *Babelomurex hidsi* Carpenter 1857 |  |
| 77 | Mollusca | Gastropoda | Caenogastropoda | Epitoniidae | *Epitonium* | *Epitonium acapulcanum* Dall 1917 |  |
| 78 | Mollusca | Gastropoda | Caenogastropoda | Epitoniidae | *Epitonium* | *Epitonium* sp. |  |
| 79 | Mollusca | Gastropoda | Caenogastropoda | Eulimidae | *Melanella* | *Melanella* sp. |  |
| 80 | Mollusca | Gastropoda | Caenogastropoda | Anabathridae | *Amphithalamus* | *Amphithalamus inclusus* Carpenter 1864 |  |
| 81 | Mollusca | Gastropoda | Caenogastropoda | Marginellidae | *Volvarina* | *Volvarina taeniolata taeniolata* Mörch 1860 |  |
| 82 | Mollusca | Gastropoda | Caenogastropoda | Pyramidellidae | *Odostomia* | *Odostomia grijalvae* F. Baker, Hanna & A.M. Strong 1928 |  |
| 83 | Mollusca | Gastropoda | Caenogastropoda | Rissoellidae | *Rissoella* | *Rissoella tumens* Carpenter 1857 |  |
| 84 | Mollusca | Gastropoda | Caenogastropoda | Rissoidae | *Alvania* | *Alvania monserratensis* F.Baker, Hanna & A.M. Strong 1930 |  |
| 85 | Mollusca | Gastropoda | Caenogastropoda | Vanikoriidae | *Vanikoro* | *Vanikoro oxychone* Mörch 1877 | New report of species for IC |
| 86 | Mollusca | Gastropoda | Caenogastropoda | Vitrinellidae | *Solariorbis* | *Solariorbis* sp. |  |
| 87 | Mollusca | Gastropoda | Nudibranchia | Chromodorididae | indet. | Chromodorididae indet. |  |
| 88 | Mollusca | Gastropoda | Bassomatophora | Siphonariidae | *Williamia* | *Williamia peltoides* Carpenter 1864 |  |
| 89 | Crustacea | Malacostraca | Decapoda | Hippolytidae | *Thor* | *Thor amboinensis* de Man 1888 |  |
| 90 | Crustacea | Malacostraca | Decapoda | Alpheidae | *Synalpheus* | *Synalpheus* sp. |  |
| 91 | Crustacea | Malacostraca | Decapoda | Xanthidae | *Paractaea* | *Paractaea sulcata* Stimpson 1860 |  |
| 92 | Crustacea | Malacostraca | Decapoda | Panopeidae | *Micropanope* | *Micropanope maculatus* | New report of the genus and species for IC |
| 93 | Crustacea | Malacostraca | Decapoda | Inachidae | *Ericerodes* | *Ericerodes veleronis* Garth 1958 | New report of species for IC |
| 94 | Crustacea | Malacostraca | Decapoda | Majidae | *Herbstia* | *Herbstia tumida* Stimpson 1871 |  |
| 95 | Crustacea | Malacostraca | Decapoda | Majidae | *Teleophrys* | *Teleophrys cristulipes* Stimpson 1860 |  |
| 96 | Crustacea | Malacostraca | Decapoda | Diogenidae | indet. | indet. indet. |  |
| 97 | Crustacea | Malacostraca | Isopoda | Cirolanidae | *Excirolana* | *Excirolana* sp. | New report of the genus for IC |
| 98 | Crustacea | Malacostraca | Isopoda | Paranthuridae | *Paranthura* | *Paranthura* sp | New report of this family and new species to be described |
| 99 | Crustacea | Malacostraca | Isopoda | Paranthuridae | *Colanthura* | *Colanthura* sp. | New report of this family and new species to be described |
| 100 | Crustacea | Malacostraca | Isopoda | Paranthuridae | *Apanthura* | *Apanthura* sp. | New report of this family and genus for IC, and probably, new species |
| 101 | Crustacea | Malacostraca | Isopoda | Joeropsididae | *Joeropsis* | *Joeropsis* sp. | New report of this family and genus for IC |
| 102 | Crustacea | Malacostraca | Isopoda | Munnidae | *Munna* | *Munna* sp. nov | New report of this family and genus for IC |
| 103 | Crustacea | Malacostraca | Isopoda | Gnathiidae | *Gnathia* | *Gnathia* sp. nov | New report of this family and genus for IC |
| 104 | Crustacea | Malacostraca | Isopoda | Aselloidea | indet. | Aselloidea indet. |  |
| 105 | Crustacea | Malacostraca | Amphipoda | Caprellidae | indet. | Caprellidae indet. A | New report of this family for IC |
| 106 | Crustacea | Malacostraca | Amphipoda | Gamaroidea | indet. | Gamaroidea indet. A |  |
| 107 | Crustacea | Malacostraca | Amphipoda | Gamaroidea | indet. | Gamaroidea indet. B |  |
| 108 | Crustacea | Malacostraca | Amphipoda | Gamaroidea | indet. | Gamaroidea indet. C |  |
| 109 | Crustacea | Malacostraca | Amphipoda | Gamaroidea | indet. | Gamaroidea indet. D |  |
| 110 | Crustacea | Malacostraca | Amphipoda | Gamaroidea | indet. | Gamaroidea indet. E |  |
| 111 | Crustacea | Malacostraca | Amphipoda | Gamaroidea | indet. | Gamaroidea indet. F |  |
| 112 | Crustacea | Malacostraca | Amphipoda | Gamaroidea | indet. | Gamaroidea indet. G |  |
| 113 | Crustacea | Malacostraca | Amphipoda | Gamaroidea | indet. | Gamaroidea indet. H |  |
| 114 | Crustacea | Malacostraca | Tanaidacea | Leptocheliidae | *Leptochelia* | *Leptochelia* sp. | New report of this family for IC |
| 115 | Crustacea | Malacostraca | Tanaidacea | Pseudotanaidae | *Pseudotanais* | *Pseudotanais* sp. nov | New report of this family for IC, and new species to be described |
| 116 | Crustacea | Malacostraca | Tanaidacea | Apseudidae | *Apseudomorpha* | *Apseudomorpha* sp. nov | New report of this family for IC, and new species to be described |
| 117 | Crustacea | Malacostraca | Mysidacea | Mysidae | *Metamysidopsis* | *Metamysidopsis* sp. | New report of this family for IC |
| 118 | Crustacea | Malacostraca | Stomatopoda | Gonodactylidae | *Neogonodactylus* | *Neogonodactylus zacae* Manning 1972 |  |
| 119 | Crustacea | Ostracoda | indet. | indet. | indet. | Ostracoda indet. |  |
| 120 | Crustacea | Ostracoda | indet. | indet. | indet. | Ostracoda indet. |  |
| 121 | Crustacea | Ostracoda | indet. | indet. | indet. | Ostracoda indet. |  |
| 122 | Crustacea | Ostracoda | indet. | indet. | indet. | Ostracoda indet. |  |
| 123 | Crustacea | Copepoda | indet. | indet. | indet. | Copepoda indet. |  |
| 124 | Crustacea | Copepoda | indet. | indet. | indet. | Copepoda indet. |  |
| 125 | Chelicerata | Pycnogonida | indet. | indet. | indet. | Pycnogonida Indet. |  |
| 126 | Chelicerata | Pycnogonida | indet. | indet. | indet. | Pycnogonida Indet. |  |
| 127 | Chelicerata | Pycnogonida | indet. | indet. | indet. | Pycnogonida Indet. |  |
| 128 | Chelicerata | Pycnogonida | indet. | indet. | indet. | Pycnogonida Indet. |  |
| 129 | Chelicerata | Acarina | indet. | indet. | indet. | Acarina indet. |  |
| 130 | Echinodermata | Ophiuroidea | Ophiurida | Ophiocomidae | *Ophiocoma* | *Ophiocoma* cf. *alexandri* Lyman 1860 |  |
| 131 | Echinodermata | Ophiuroidea | Ophiurida | Ophiactidae | *Ophiactis* | *Ophiactis savigny* Müller & Troschel 1842 |  |
| 132 | Echinodermata | Echinoidea | Diadematoida | Diadematidae | *Diadema* | *Diadema mexicanum* A. Agassiz 1863 |  |
| 133 | Echinodermata | Echinoidea | Diadematoida | Echinometridae | *Echinometra* | *Echinometra* sp. |  |
| 134 | Ectoprocta | Stenolaemata | Cyclostomatida | Crisiidae | *Crisia* | *Crisia elongata* Edwards 1838 |  |
| 135 | Ectoprocta | Stenolaemata | Cyclostomatida | Tubuliporidae | *Tubulipora* | *Tubulipora pulchra* MacGillivray 1885 | New report of species for IC |
| 136 | Ectoprocta | Gymnolaemata | Cheilostomata | Beaniidae | *Beania* | *Beania hirtissima* Heller 1867 |  |
| 137 | Ectoprocta | Gymnolaemata | Cheilostomata | Buffonellodidae | *Aimulosia* | *Aimulosia uvulifera* Osburn 1914 |  |
| 138 | Ectoprocta | Gymnolaemata | Cheilostomata | Cupuladriidae | *Discoporella* | *Discoporella umbellata* Defrance 1823 |  |
| 139 | Chordata | Ascidiacea | Stolidobranchia | Pyuridae | indet. | Pyuridae indet. |  |
| 140 | Chordata | Ascidiacea | Phlebobranchia | Perophoridae | indet. | Perophoridae indet. | New report of this family for IC |
| 141 | Chordata | Actinoterygii | Perciformes | Cirrhitidae | *Cirrhitichthys* | *Cirrhitichthys oxycephalus* Bleeker 1855 |  |
| 142 | Chordata | Actinoterygii | Perciformes | Chaenopsidae | *Emblemaria* | *Emblemaria nivipes* Jordan & Gilbert 1883 |  |
| 143 | Chordata | Actinoterygii | Perciformes | Chaenopsidae | *Emblemaria* | *Emblemaria piratica* Ginsburg 1942 | New report of species for IC |
| 144 | Chordata | Actinoterygii | Perciformes | Lutjanidae | *Lutjanus* | *Lutjanus colorado* Jordan & Gilbert 1882 |  |
| 145 | Chordata | Actinoterygii | Perciformes | Lutjanidae | *Lutjanus* | *Lutjanus* cf. *argentiventris* Peters 1869 |  |
