# Supplementary material for: Macrofauna Associated With a Rhodolith Bed at an Oceanic Island in the Eastern Tropical Pacific (Isla del Coco National Park, Costa Rica)
Source: Frontiers journal article supplement (doi:10.3389/fmars.2022.858416), 2022-04-25
Supplement: Table_2.DOCX [file Table_2.DOCX]

**Appendix 2.** Some reproductive traits of crustacean found in rhodoliths in Isla del Coco.

| **Species** | **Number of rhodoliths with females carrying eggs or embryos** | **Total number of individuals (including both sexes plus immatures)** | **Number of females carrying eggs or embryos** | **Average number of eggs or embryos per individual** |
| --- | --- | --- | --- | --- |
| Amphipoda indet. A | 17 | 389 | 59 | 2.4 |
| *Munna sp.* | 7 | 17 | 14 | 4 |
| *Leptochelia* sp. | 6 | 53 | 11 | 4 |
| Amphipoda indet. D | 4 | 19 | 10 | 4.4 |
| *Aspeudomorpha* sp. | 3 | 83 | 9 | 3.9 |
| *Synalpheus* sp. | 5 | 24 | 6 | 39.4 |
| Amphipoda indet. B | 3 | 27 | 5 | 3.5 |
| *Jaeropsis sp.* | 5 | 12 | 5 | 3.4 |
| Amphipoda indet. C | 2 | 18 | 4 | 1.8 |
| *Thor amboinensis* | 1 | 7 | 4 | 7.5 |
| Amphipoda indet. F | 2 | 7 | 3 | 3.25 |
| Amphipoda indet. G | 1 | 5 | 3 | 2.7 |
| *Pseudotanais* sp. | 2 | 21 | 3 | 3.2 |
| *Gnathia* sp. | 1 | 4 | 2 | 29 |
| *Paranthura* sp. | 1 | 7 | 2 | 3.5 |
| Amphipoda indet. E | 1 | 7 | 1 | 1 |
| Amphipoda indet. H | 1 | 24 | 1 | 1 |
| Ostracoda indet.C | 1 | 1 | 1 | 5 |
| *Lophopanopeus maculatus* | 1 | 2 | 1 | several hundreds |
|  | TOTAL | 727 | 144 |  |
